# Supplementary material for: Seroprevalence of SARS-CoV-2 IgG in healthcare workers and other staff at North Bristol NHS Trust: a sociodemographic analysis
Source: bioRxiv or medRxiv preprint supplement (doi:10.1101/2020.11.12.20230458), 2020-11-16
Supplement: Supplementary file [file media-1.pdf]

## Supplementary material

**Supplementary table I: Odds of attending for testing according to demographic and socioeconomic factors.** These data were used to generate the inverse probability weighted model for assessing factors associated with SARS-CoV-2 seroprevalence. For factors with multiple categories, the 15 most populous are presented and the remaining collated into “other”, which forms the reference group.

| Characteristic                          | OR <sup>1</sup> | 95% CI <sup>1</sup> | p-value |
|-----------------------------------------|-----------------|---------------------|---------|
| <b>Ethnicity</b>                        |                 |                     |         |
| White                                   | —               | —                   |         |
| BAME                                    | 0.85            | 0.76, 0.96          | 0.007   |
| Undisclosed                             | 0.51            | 0.41, 0.62          | <0.001  |
| <b>Gender</b>                           |                 |                     |         |
| Female                                  | —               | —                   |         |
| Male                                    | 0.82            | 0.74, 0.91          | <0.001  |
| <b>Age</b>                              |                 |                     |         |
| 31-40                                   | —               | —                   |         |
| <=20 Years                              | 1.04            | 0.77, 1.41          | 0.8     |
| >=71 Years                              | 0.55            | 0.28, 1.02          | 0.064   |
| 21-30                                   | 1.15            | 1.03, 1.29          | 0.016   |
| 41-50                                   | 1.33            | 1.17, 1.50          | <0.001  |
| 51-60                                   | 1.26            | 1.11, 1.43          | <0.001  |
| 61-70                                   | 0.94            | 0.79, 1.13          | 0.5     |
| IMD                                     | 1               | 0.99, 1.02          | 0.6     |
| <b>Specialty</b>                        |                 |                     |         |
| Other                                   | —               | —                   |         |
| Cluster 1 - Neurosurgery, Spines & Pain | 1.83            | 1.39, 2.44          | <0.001  |
| Cluster 2 - Trauma & Orthopaedics       | 1.93            | 1.47, 2.56          | <0.001  |
| Cluster 3                               | 1.32            | 1.04, 1.68          | 0.025   |
| Critical Care Services                  | 0.96            | 0.72, 1.27          | 0.8     |
| FOH Domestic                            | 0.74            | 0.57, 0.96          | 0.024   |
| General Surgery Services                | 1.86            | 1.41, 2.48          | <0.001  |
| Imaging                                 | 1.43            | 1.14, 1.82          | 0.002   |
| Maternity Services                      | 2.03            | 1.46, 2.88          | <0.001  |
| Medicine Cluster 1                      | 1.46            | 1.21, 1.77          | <0.001  |
| Medicine Cluster 2                      | 1.24            | 1.01, 1.52          | 0.04    |
| Medicine Cluster 4                      | 1.25            | 0.98, 1.60          | 0.076   |
| Other Bank Services                     | 0.17            | 0.14, 0.19          | <0.001  |
| Pathology Services                      | 0.76            | 0.62, 0.93          | 0.007   |
| Theatre Services                        | 1.53            | 1.22, 1.93          | <0.001  |
| Therapies Services                      | 1.74            | 1.33, 2.29          | <0.001  |
| <b>Role</b>                             |                 |                     |         |
| Other                                   | —               | —                   |         |
| Assistant                               | 0.84            | 0.68, 1.05          | 0.13    |
| Clerical Worker                         | 0.86            | 0.72, 1.01          | 0.066   |
| Consultant                              | 1.12            | 0.91, 1.39          | 0.3     |
| Foundation Year 2                       | 0.97            | 0.70, 1.32          | 0.8     |
| Health Care Support Worker              | 0.79            | 0.61, 1.01          | 0.063   |
| Healthcare Assistant                    | 0.69            | 0.58, 0.82          | <0.001  |
| Healthcare Science Assistant            | 0.91            | 0.68, 1.22          | 0.5     |
| Healthcare Science Practitioner         | 0.96            | 0.73, 1.28          | 0.8     |
| Housekeeper                             | 0.75            | 0.57, 0.98          | 0.033   |
| Manager                                 | 0.98            | 0.75, 1.30          | 0.9     |
| Midwife                                 | 0.62            | 0.41, 0.91          | 0.018   |
| Officer                                 | 0.83            | 0.68, 1.02          | 0.074   |
| Porter                                  | 0.6             | 0.43, 0.82          | 0.001   |
| Specialty Registrar                     | 0.59            | 0.48, 0.72          | <0.001  |
| Staff Nurse                             | 1.14            | 0.99, 1.31          | 0.078   |

<sup>1</sup> OR = Odds Ratio, CI = Confidence Interval

**Supplementary table II: Seniority of Medical and Dental HCWs stratified by ethnicity.** Data are restricted to those staff members that comprise the Medical and Dental group.

| Characteristic              | BAME<br>N = 309 |      | Undisclosed<br>N = 126 |      | White<br>N = 1,313 |      |
|-----------------------------|-----------------|------|------------------------|------|--------------------|------|
|                             | n               | %    | n                      | %    | n                  | %    |
| Role                        |                 |      |                        |      |                    |      |
| Consultant                  | 119             | 39%  | 46                     | 37%  | 414                | 32%  |
| Specialty Registrar         | 116             | 38%  | 48                     | 38%  | 520                | 40%  |
| Specialty Doctor            | 19              | 6.1% | 2                      | 1.6% | 30                 | 2.3% |
| Trust Grade Doctor          | 2               | 0.6% | 1                      | 0.8% | 8                  | 0.6% |
| Foundation Year 2           | 39              | 13%  | 24                     | 19%  | 247                | 19%  |
| Foundation Year 1           | 12              | 3.9% | 5                      | 4%   | 83                 | 6.3% |
| Statistics presented: n (%) |                 |      |                        |      |                    |      |

**Supplementary table III: SARS-CoV-2 IgG seroprevalence in HCWs and support staff from inpatient wards and dialysis units managed by the Trust.** Data represent proportion of the tested population. Specialty of ward area reported in place of ward names.

| Variable                   | Serology +ve |       | Total |
|----------------------------|--------------|-------|-------|
|                            | n            | %     |       |
| Dialysis Unit 1            | 10           | 58.8% | 17    |
| Cardiology                 | 22           | 52.4% | 42    |
| Elderly Care step-down     | 20           | 50.0% | 40    |
| Elderly Care               | 19           | 38.8% | 49    |
| Elderly Care               | 13           | 31.0% | 42    |
| Dialysis Unit 2            | 6            | 30.0% | 20    |
| General Medicine           | 12           | 27.9% | 43    |
| Elderly Care step-down     | 10           | 27.8% | 36    |
| Urology                    | 8            | 25.8% | 31    |
| Neurorehabilitation Unit   | 1            | 25.0% | 4     |
| Surgery                    | 9            | 24.3% | 37    |
| Stroke                     | 12           | 23.1% | 52    |
| Surgery/Orthopaedics       | 8            | 22.2% | 36    |
| Complex Medical + COVID-19 | 9            | 20.9% | 43    |
| Gastroenterology           | 9            | 18.8% | 48    |
| Acute Medical Unit         | 18           | 16.2% | 111   |
| Orthopaedics               | 6            | 15.4% | 39    |
| Respiratory + COVID-19     | 6            | 13.6% | 44    |
| Surgery                    | 7            | 13.0% | 54    |
| General Medicine           | 5            | 11.1% | 45    |
| Emergency Dept             | 4            | 10.8% | 37    |
| Surgery                    | 5            | 8.8%  | 57    |
| Neurosurgery               | 4            | 8.7%  | 46    |
| Orthopaedics               | 3            | 7.9%  | 38    |
| Dialysis Unit 3            | 1            | 7.1%  | 14    |
| Emergency Dept – Nursing   | 12           | 6.9%  | 173   |
| Vascular                   | 3            | 6.7%  | 45    |
| Neurology                  | 2            | 5.0%  | 40    |
| Renal                      | 2            | 5.0%  | 40    |
| Dialysis Unit 4            | 1            | 4.8%  | 21    |
| Surgical                   | 1            | 3.4%  | 29    |
| Adult ICU                  | 4            | 2.5%  | 159   |
| Neonatal ICU               | 2            | 2.2%  | 93    |
| Women's Health             | 0            | 0.0%  | 24    |
| Dialysis Unit 5            | 0            | 0.0%  | 14    |
